# Supplementary material for: Intensifying strategy of ionic liquids for Pd-based catalysts in anthraquinone hydrogenation
Source: Royal Society of Chemistry journal article supplement (doi:10.1039/d1cy01986d), 2021-12-21
Supplement: d1cy01986d1.pdf [file d1cy01986d1.pdf]

## **Supporting Information**

### **Intensifying strategy of ionic liquid for Pd-based catalysts in anthraquinone hydrogenation**

Fuying Wang<sup>a</sup>, Yiming Jia<sup>a</sup>, Jingyue Liang<sup>a</sup>, Jinli Zhang<sup>a</sup>, Xiaoyan Li<sup>b, \*</sup>, Wei Li<sup>a, \*</sup>

*<sup>a</sup> School of Chemical Engineering and Technology, Tianjin University, Tianjin 300350,  
P. R. China.*

*<sup>b</sup> Department of Chemical Engineering, Tianjin Renai college, Tianjin 301636, P. R.  
China.*

\*Corresponding author:

E-mail: [liwei@tju.edu.cn](mailto:liwei@tju.edu.cn) (W. Li); [lixiaoyan1647@163.com](mailto:lixiaoyan1647@163.com) (X. Li)

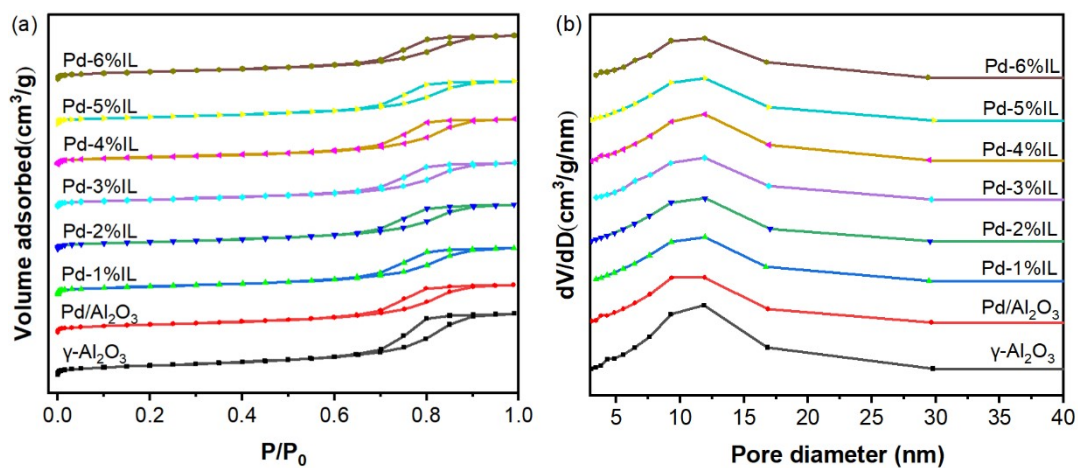

**Fig. S1** (a)  $N_2$  adsorption-desorption isotherms and (b) the pore size distributions of catalyst samples (Barrett-Joyner-Halenda (BJH) method was used to calculate the pore volume and the pore size distribution. Brunauer-Emmett-Teller (BET) method was used to calculate the specific surface area.)

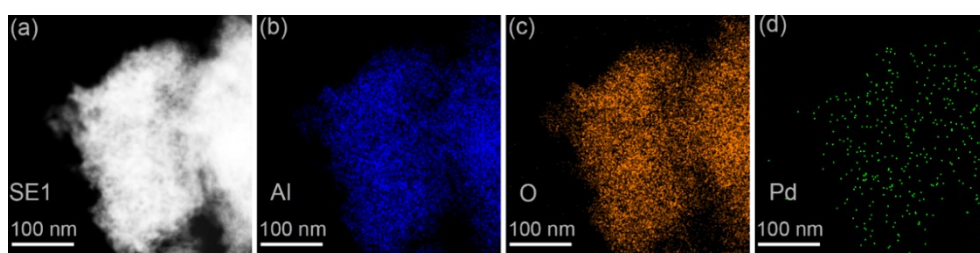

**Fig. S2** (a) STEM image of  $Pd/Al_2O_3$  catalyst; (b)-(d) elemental mapping images of Al (blue), O (orange) and Pd (green), respectively

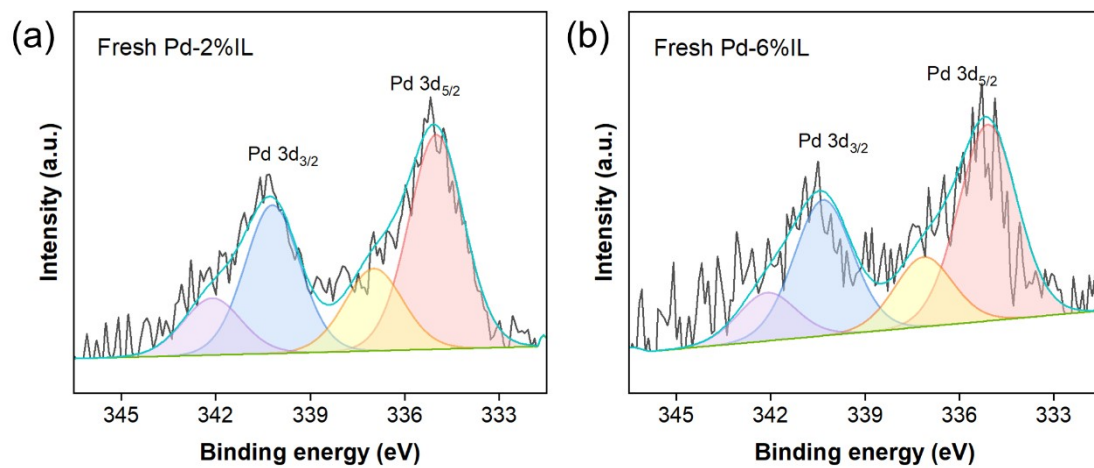

**Fig. S3** XPS Pd 3d spectra of (a) fresh Pd-2%IL and (b) fresh Pd-6%IL

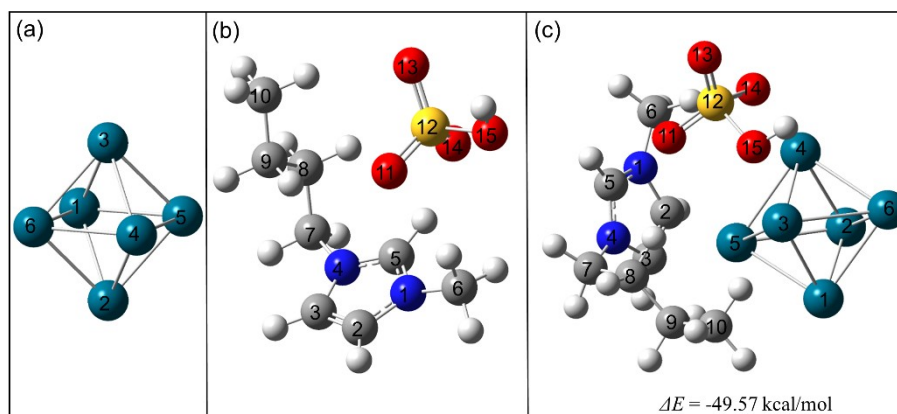

**Fig. S4** The stable structures and serial number of (a) Pd<sub>6</sub> cluster, (b) IL and (c) Pd<sub>6</sub>-IL.

Carbon, hydrogen, oxygen, nitrogen, sulfur, palladium atoms are depicted in gray, white, red, blue, orange and green, respectively.

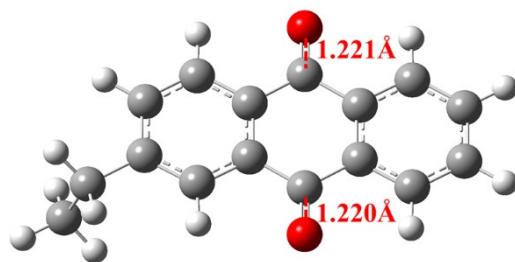

**Fig. S5** The stable structure of EAQ. Carbon, hydrogen, oxygen, are depicted in gray, white and red, respectively.

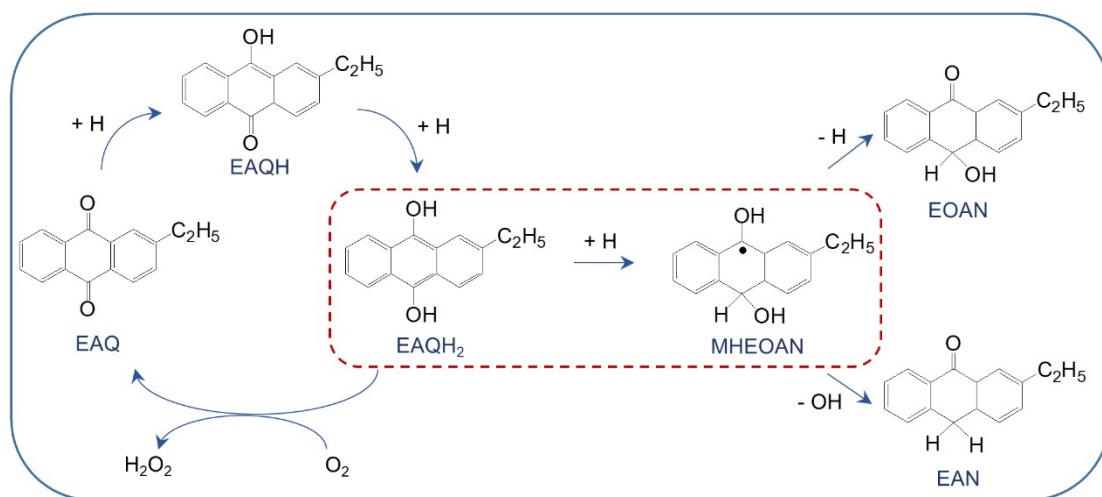

**Fig. S6** Reaction paths of 2-ethyl-anthraquinone hydrogenation [1, 2].

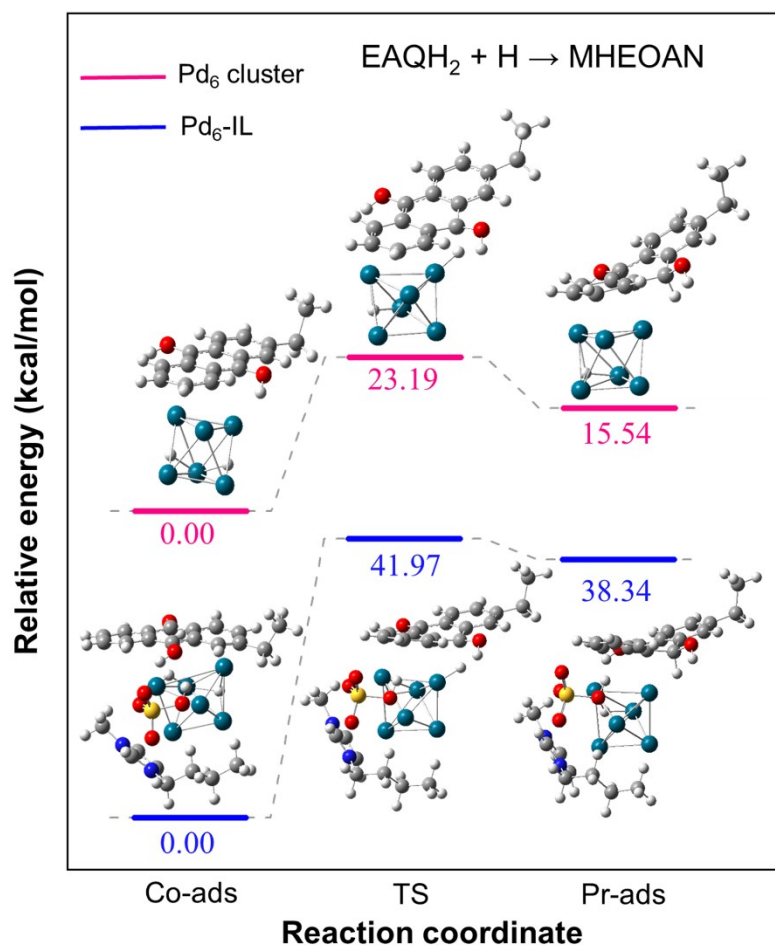

**Fig.S7** The unwanted reaction pathway (EAQH<sub>2</sub> + H → MHEOAN) with the optimized structure in the illustration: Co-adsorbed reactants (Co-ads), transition state (TS), product-adsorbed (Pr-ads). Carbon, hydrogen, oxygen, nitrogen, sulfur, palladium atoms are represented in gray, white, red, blue, orange and green balls, respectively

**Table S1** Actual load of Pd in catalysts by ICP-AES

| Catalyst                          | Pd content (wt%) |
|-----------------------------------|------------------|
| Pd/Al <sub>2</sub> O <sub>3</sub> | 0.26             |
| Pd-1%IL                           | 0.24             |
| Pd-2%IL                           | 0.25             |
| Pd-3%IL                           | 0.24             |
| Pd-4%IL                           | 0.25             |
| Pd-5%IL                           | 0.28             |
| Pd-6%IL                           | 0.28             |

**Table S2** STY of H<sub>2</sub>O<sub>2</sub> for Pd/Al<sub>2</sub>O<sub>3</sub> and Pd-4%IL catalysts with different reaction time

| Sample                            | STY (g g <sub>Pd</sub> <sup>-1</sup> h <sup>-1</sup> ) |        |        |
|-----------------------------------|--------------------------------------------------------|--------|--------|
|                                   | 15 min                                                 | 30 min | 45 min |
| Pd/Al <sub>2</sub> O <sub>3</sub> | 743                                                    | 684    | 512    |
| Pd-4%IL                           | 1229                                                   | 837    | 604    |

**Table S3** Charge distribution of major atoms in IL before and after adsorption of Pd<sub>6</sub>

|                             | Atom number | IL (e) | Pd <sub>6</sub> -IL (e) |
|-----------------------------|-------------|--------|-------------------------|
| Cation                      | N1          | -0.307 | -0.273                  |
|                             | C2          | 0.204  | 0.069                   |
|                             | C3          | 0.174  | 0.053                   |
|                             | N4          | -0.304 | -0.270                  |
|                             | C5          | 0.518  | 0.514                   |
|                             | C6          | 0.297  | 0.297                   |
|                             | C7          | 0.177  | 0.177                   |
|                             | C8          | 0.065  | 0.095                   |
|                             | C9          | -0.015 | 0.007                   |
|                             | C10         | 0.044  | 0.078                   |
| Anion                       | O11         | -0.626 | -0.577                  |
|                             | S12         | 1.162  | 1.236                   |
|                             | O13         | -0.549 | -0.485                  |
|                             | O14         | -0.605 | -0.573                  |
|                             | O15         | -0.236 | -0.192                  |
| Total charge of major atoms |             | -0.001 | 0.156                   |

(N1 to O15 are respectively the first to the fifteenth atoms in IL shown in Fig.S4.)

## References

- [1] A. Li, Y.H. Wang, J. Ren, J.L. Zhang, W. Li, C.L. Guo, Enhanced catalytic activity and stability over P-modified alumina supported Pd for anthraquinone hydrogenation, *Appl Catal a-Gen*, 593 (2020).
- [2] T. Kamachi, T. Ogata, E. Mori, K. Iura, N. Okuda, M. Nagata, K. Yoshizawa, Computational exploration of the mechanism of the hydrogenation step of the anthraquinone process for hydrogen peroxide production, *The Journal of Physical Chemistry C*, 119 (2015) 8748-8754.
